# Supplementary material
Source: publisher figshare collection journal article supplement (https://frontiersin.figshare.com/ndownloader/files/24117224)
Supplement: Supplementary file [file 24117224]

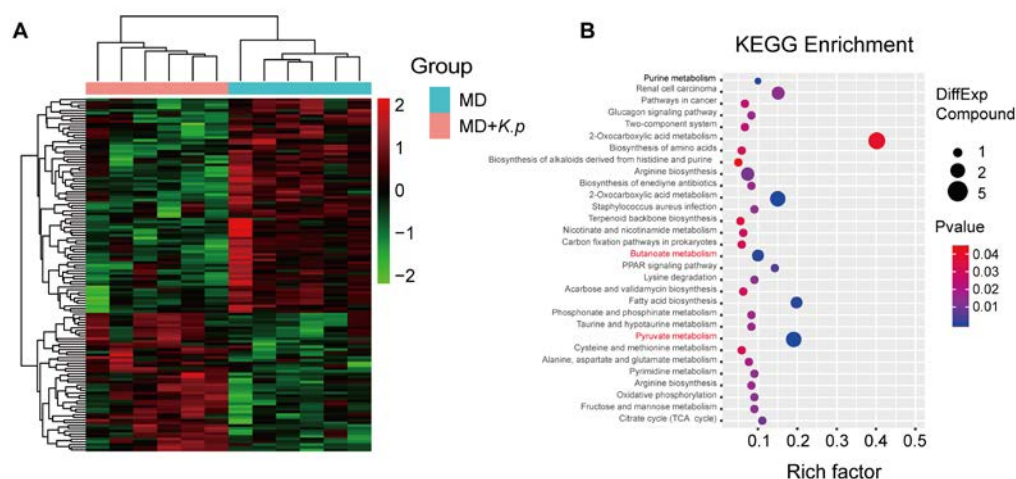

# **SUPPLEMENTARY FIGURE 1. Differential metabolites and KEGG pathway enrichment.**

(A) Hierarchical clustering heatmap of metabolites identified in cecum contents from *K. pneumoniae*-infected, microbiota-depleted mice versus microbiota-depleted controls. Red denotes increased expression; green denotes decreased expression. (B) Selected examples of KEGG pathway enrichment. Disturbances on propionate and butyrate metabolisms are highlighted in red color. The *P* values are determined using Hypergeometric test and Benjamini-Hochberg FDR correction (A). MD, gut microbiota-depleted mice.



controls. Conditions:  $r > 0.8$  &  $p < 0.05$ . The  $P$  values are determined using two-tailed Wilcoxon rank-sum test (**B**).  $*P < 0.05$ ,  $***P < 0.001$ . MD, gut microbiota-depleted mice.
